# Supplementary material for: Cancer-associated fibroblast-derived gene signatures determine prognosis in colon cancer patients
Source: Springer Nature journal article supplement (doi:10.1186/s12943-021-01367-x), 2021-04-29

# Additional File 7

**A**

**Stages I-II & III-IV (1235 samples)**

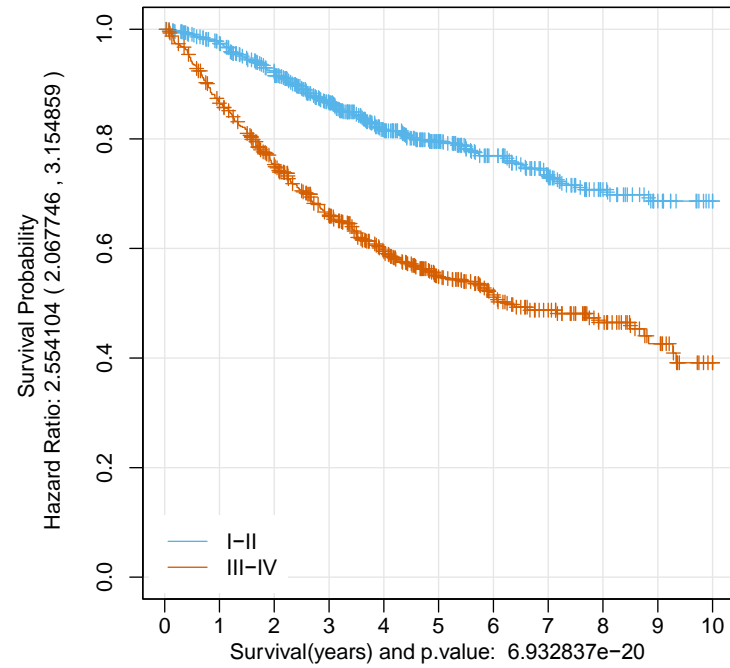

**B**

**CMS1,2,3 & CMS4 (830 samples)**

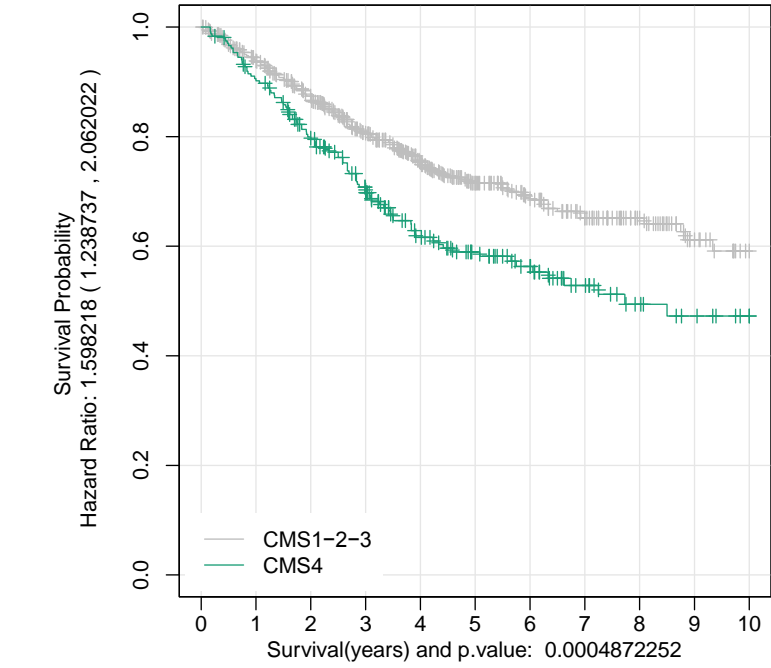

Supplement: MOESM7 [file 19118394]
