# Supplementary material for: Cancer-associated fibroblast-derived gene signatures determine prognosis in colon cancer patients
Source: Springer Nature journal article supplement (doi:10.1186/s12943-021-01367-x), 2021-04-29
Supplement: MOESM8 [file 19118394]

# Additional File 8

**A**

**Top 50 genes exosome signature**  
Stages I-II Lower Risk (N = 660)

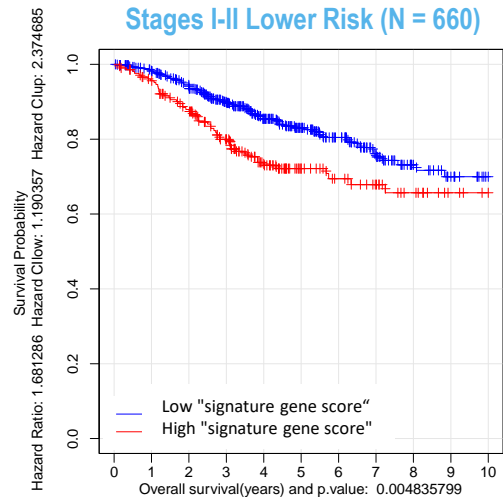

low. — 451 422 376 307 240 180 136 88 52 37 25  
high. — 209 192 166 131 94 61 47 37 25 16 13

**Top 50 genes CAF signature**  
Stages I-II Lower Risk (N = 660)

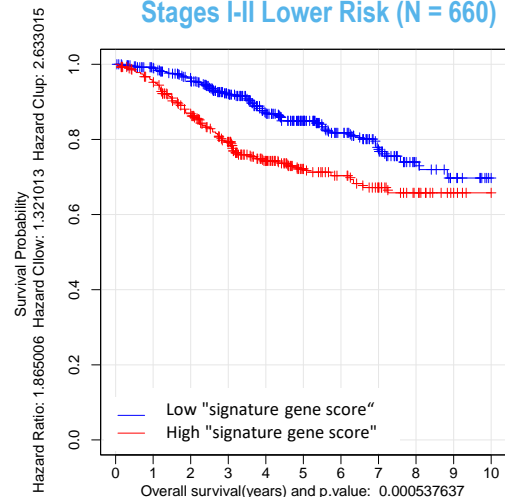

low.risk — 381 359 326 265 208 156 112 70 39 27 16  
high.risk — 279 255 216 173 126 85 71 55 38 26 22

**Top 50 genes exosome signature**  
Stages III-IV Higher Risk (N = 575)

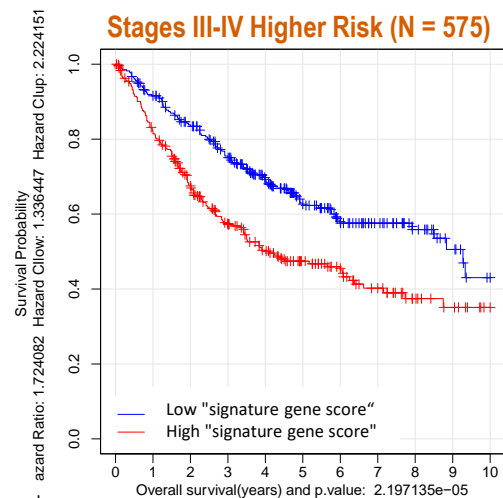

low. — 276 245 210 175 135 93 70 48 31 17 8  
high. — 299 237 180 135 100 69 53 35 20 13 5

**Top 50 genes CAF signature**  
Stages III-IV Higher Risk (N = 575)

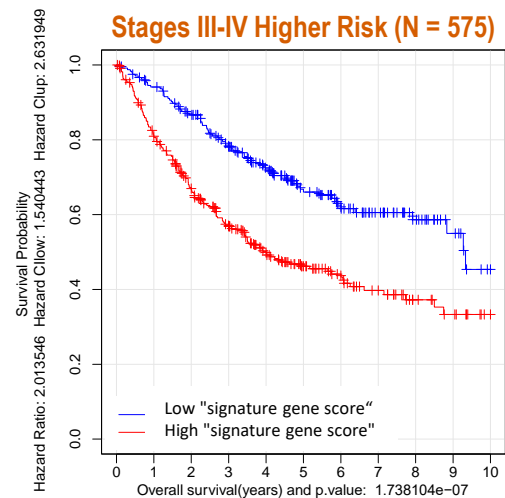

low.risk — 241 220 191 159 125 86 67 46 29 15 6  
high.risk — 334 262 199 151 110 76 56 37 22 15 7

**B**

**Top 50 genes exosome signature**  
CMS4 Higher Risk (N = 237)

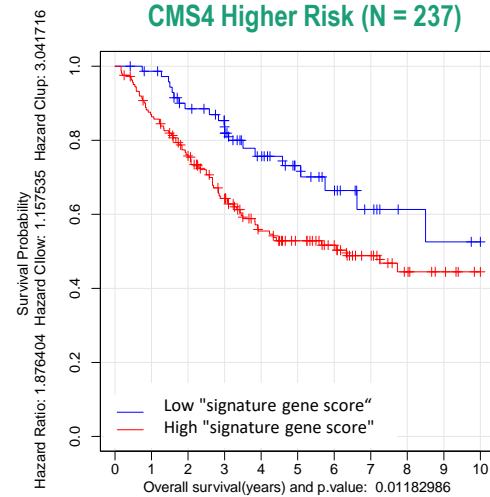

low. — 74 71 59 50 34 24 18 11 7 6 4  
high. — 163 139 116 90 64 52 39 27 18 13 5

**Top 50 genes CAF signature**  
CMS4 Higher Risk (N = 237)

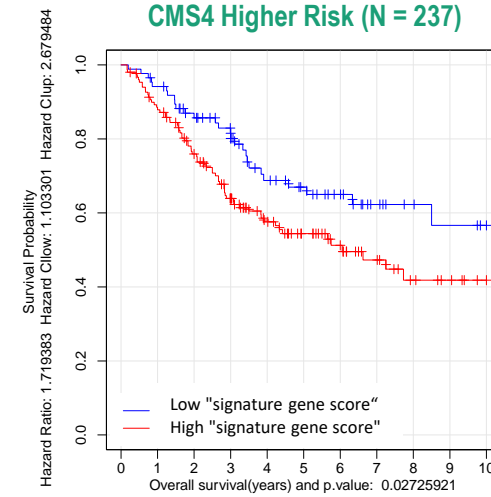

low. — 86 80 69 59 41 34 26 17 12 10 8  
high. — 151 130 106 81 57 42 31 21 13 9 5

**Top 50 genes exosome signature**  
CMS1,2,3 Lower Risk (N = 593)

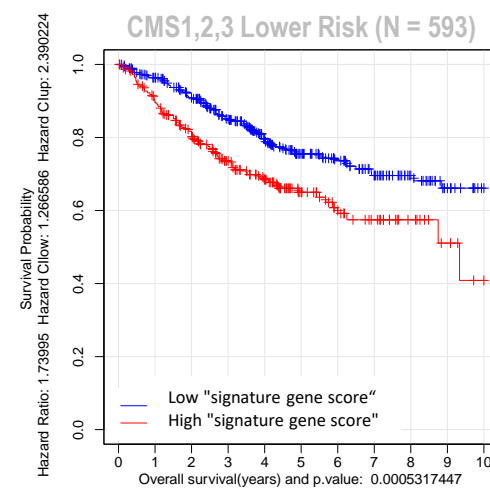

low. — 369 334 290 240 187 136 107 76 49 29 1  
high. — 224 192 162 122 96 56 39 28 15 7

**Top 50 genes CAF signature**  
CMS1,2,3 Lower Risk (N = 593)

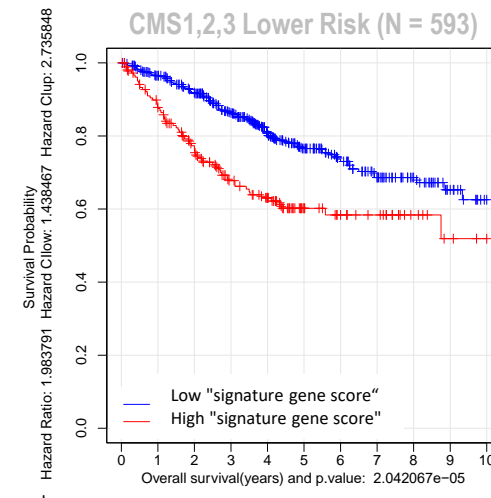

low. — 410 373 330 273 210 155 117 80 51 29 15  
high. — 183 153 122 89 73 37 29 24 13 7 5
